# Supplementary material for: Unfolding of Lignin Structure Using Size-Exclusion Fractionation
Source: MDPI journal article supplement (doi:10.3390/polym15193956), 2023-09-30

# Unfolding of Lignin Structure Using Size-Exclusion Fractionation

Audrey LaVallie <sup>1,2</sup>, Anastasia A. Andrianova <sup>1,3</sup>, Joshua Schumaker <sup>1,4</sup>, Sarah Reagen <sup>1,5</sup>, Shelly Lu <sup>1</sup>, Irina P. Smoliakova <sup>1</sup>, Evguenii I. Kozliak <sup>1,\*</sup> and Alena Kubátová <sup>1,\*</sup>

- <sup>1</sup> Department of Chemistry, University of North Dakota, 151 Cornell St., Mail Stop 9024, Grand Forks, ND 58202, USA; alavallie@nhsc.edu (A.L.); anastasia.andrianova@agilent.com (A.A.A.); josh.schumaker@hotmail.com (J.S.); sereagen@gmail.com (S.R.); shellylu01@gmail.com (S.L.); irina.smoliakova@und.edu (I.P.S.)
- <sup>2</sup> Nueta Hidatsa Sahnish College, 220 8th Ave. E, New Town, ND 58763, USA
- <sup>3</sup> Agilent Technologies, 2850 Centerville Rd., Wilmington, DE 19808, USA
- <sup>4</sup> SCIEX, 1201 Radio Rd., Redwood City, CA 94065, USA
- <sup>5</sup> North Dakota Office of the Attorney General, Crime Laboratory Division, 2641 E Main Ave., Bismarck, ND 58501, USA
- \* Correspondence: evguenii.kozliak@und.edu (E.I.K.); alena.kubatova@und.edu (A.K.)

## List of Figures and Tables

|                                                                                                                                                     |    |
|-----------------------------------------------------------------------------------------------------------------------------------------------------|----|
| Table S1. Calibration data for PS, PMMA standards obtained for analytical SEC.....                                                                  | 2  |
| Figure S1. Calibration curve for PS, PMMA standards obtained for analytical SEC separation .....                                                    | 2  |
| Figure S2. SEC preparative and analytical chromatograms for preliminary fractionation experiments .....                                             | 3  |
| Table S2. MW characterization of the five fractions obtained by preparative SEC and unfractionated alkali lignin conducted with ESI-TOF HR MS. .... | 6  |
| Figure S3. ESI-TOF HR MS spectra for SEC lignin fractions 1 – 5 .....                                                                               | 7  |
| Figure S4. Aggregated TD-Py-GC-MS peak areas based on the GC-MS TIC response .....                                                                  | 9  |
| Figure S5. TD-Py-GC-MS profiles for each SEC fraction based on the TIC peak areas response .....                                                    | 10 |
| Figure S6. <sup>31</sup> P NMR spectra of SEC weight fractionated lignin samples.....                                                               | 11 |
| Figure S7. Relative abundance of characteristic functional groups determined by <sup>31</sup> P NMR .....                                           | 12 |

Table S1. Calibration data for PS, PMMA standards obtained for analytical SEC

| TYPE | MW    | log MW   | tr, min |
|------|-------|----------|---------|
| PMMA | 550   | 2.740363 | 9.783   |
| PMMA | 960   | 2.982271 | 9.404   |
| PMMA | 1780  | 3.25042  | 8.739   |
| PMMA | 2800  | 3.447158 | 8.401   |
| PMMA | 4640  | 3.666518 | 8.019   |
| PMMA | 6850  | 3.835691 | 7.710   |
| PMMA | 10280 | 4.011993 | 7.338   |
| PMMA | 17810 | 4.250664 | 6.856   |
| PMMA | 26080 | 4.416308 | 6.550   |
| PS   | 580   | 2.763428 | 9.675   |
| PS   | 1480  | 3.170262 | 8.879   |
| PS   | 2340  | 3.369216 | 8.496   |
| PS   | 5030  | 3.701568 | 7.860   |
| PS   | 8450  | 3.926857 | 7.395   |
| PS   | 19760 | 4.295787 | 6.655   |

Figure S1. Calibration curve for PS, PMMA standards obtained for analytical SEC separation

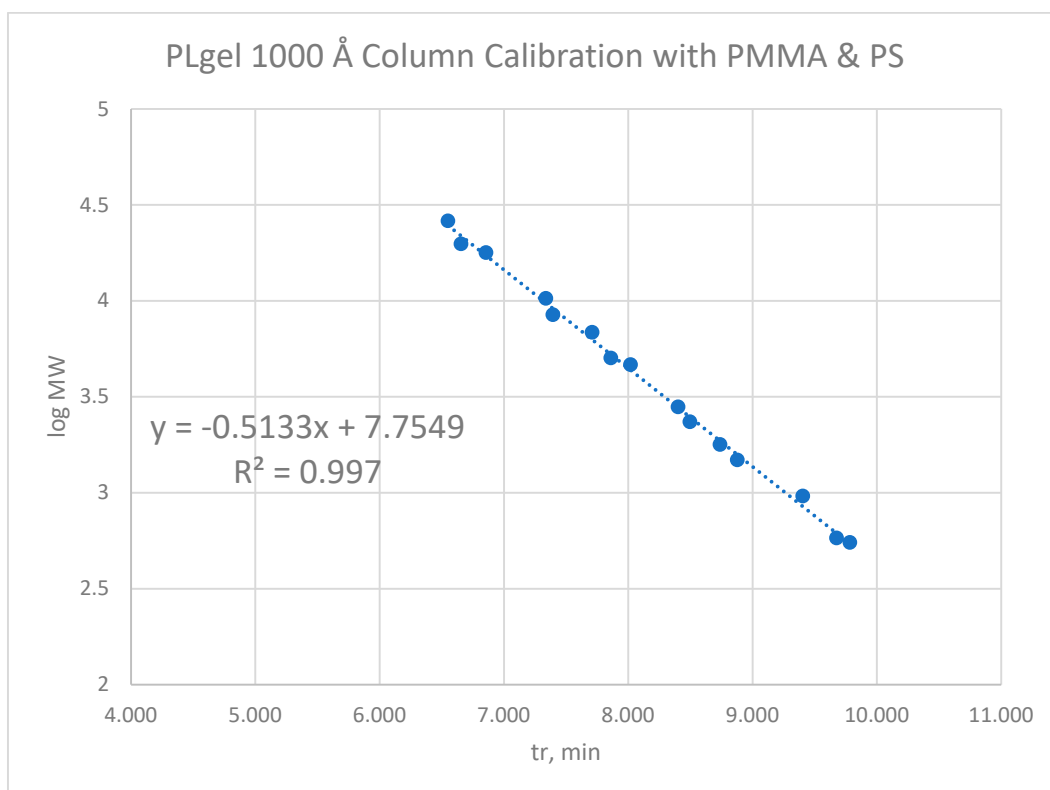

Figure S2. SEC preparative and analytical chromatograms for preliminary fractionation experiments

a) Preparation SEC - Fractionation 1 – focus on specific MW (not equal time intervals)

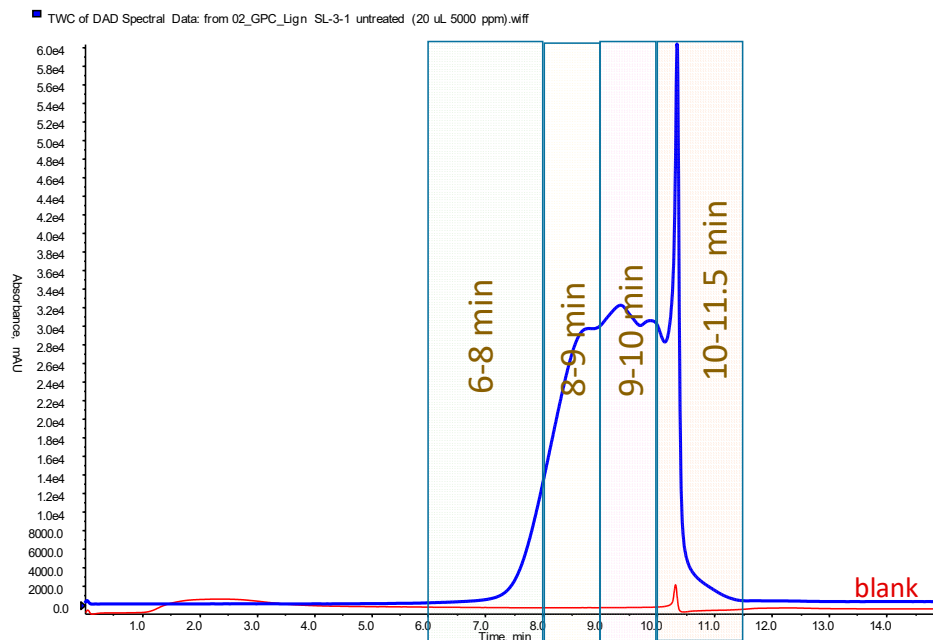

b) Analytical SEC - Fractionation 1 – focus on specific MW (not equal time intervals)

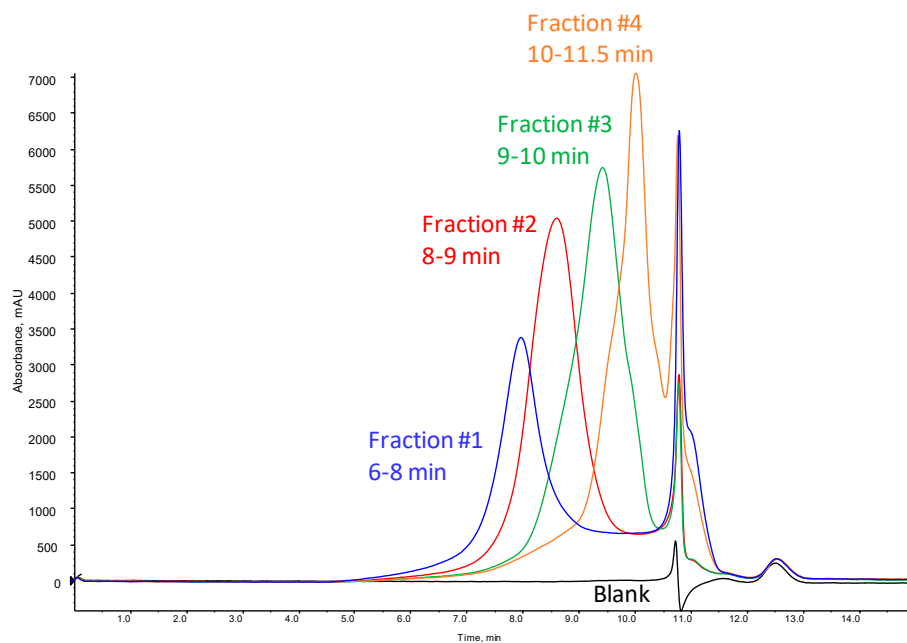

c) Preparation SEC - Fractionation 2 – focus on specific MW (not equal time intervals)

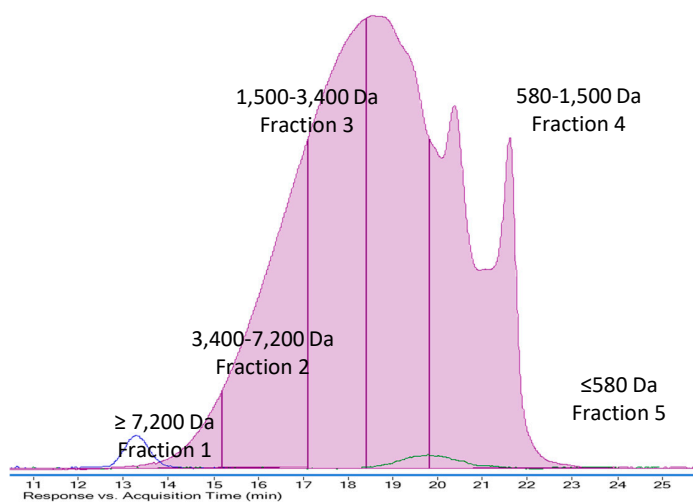

d) Analytical SEC - Fractionation 2 – focus on specific MW (not equal time intervals)

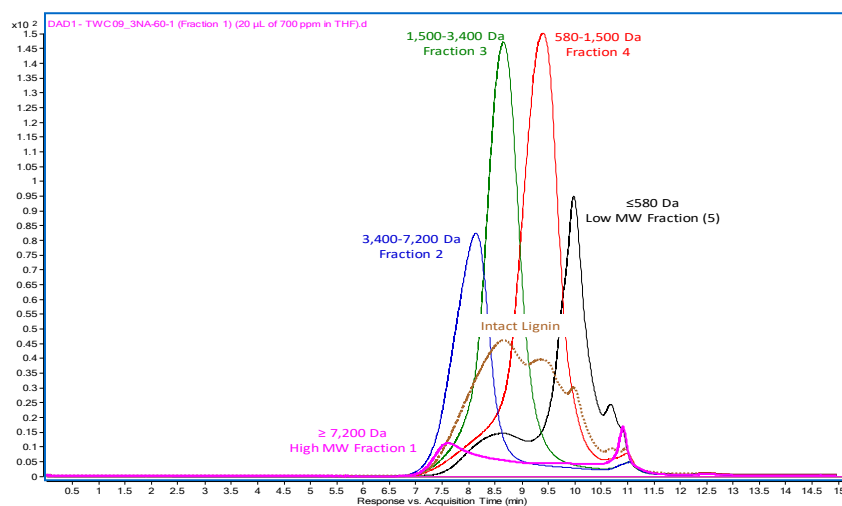

e) Preparation SEC - Fractionation 3— including pre and post-eluate

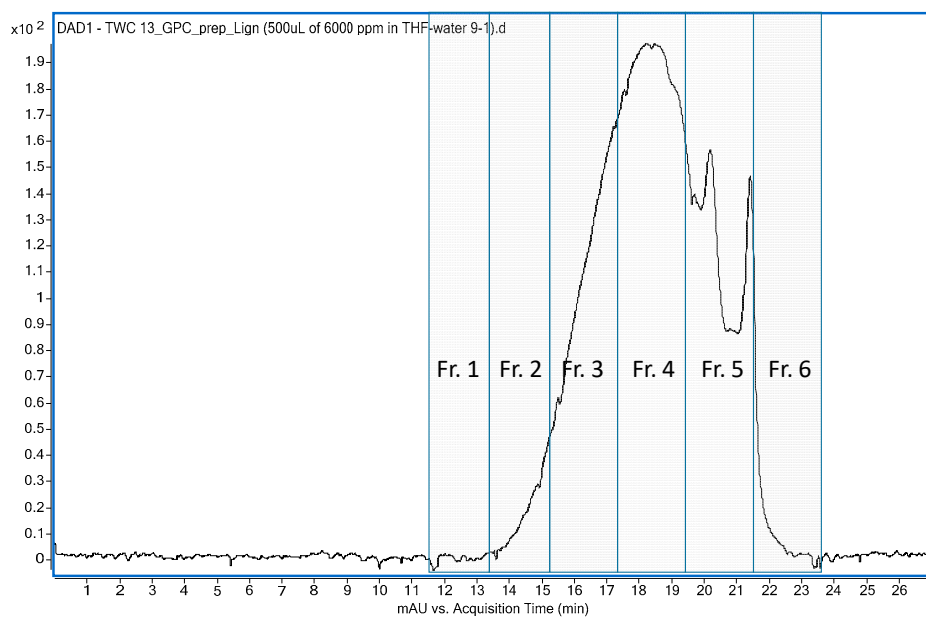

f) Analytical SEC - Fractionation 3 — including pre and post-eluate

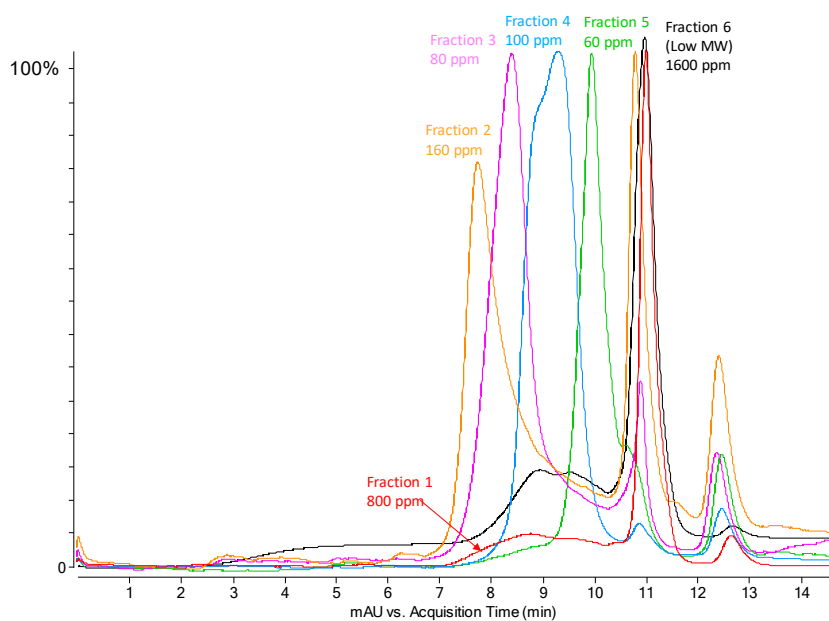

Table S2. MW characterization of the five fractions obtained by preparative SEC and unfractionated alkali lignin conducted with ESI-TOF HR MS.

| ESI-TOF HR TOF MS    |      |      |      |      |      |               |
|----------------------|------|------|------|------|------|---------------|
| Fractions            | 1    | 2    | 3    | 4    | 5    | Alkali Lignin |
| <b>M<sub>n</sub></b> | 1330 | 1634 | 1028 | 1188 | 522  | 869           |
| <b>M<sub>w</sub></b> | 3160 | 3547 | 2266 | 2853 | 1335 | 1881          |
| <b>M<sub>z</sub></b> | 5261 | 5557 | 4500 | 4820 | 3321 | 3767          |
| <b>PDI</b>           | 2.4  | 2.2  | 2.2  | 2.4  | 2.6  | 2.2           |

Figure S3. ESI-TOF HR MS spectra for SEC lignin fractions 1 – 5

MS data shown as the direct acquisition ( $m/z$ ) and upon deconvolution (Da). All fractions were diluted 5 times except fraction 1, which was diluted 2 times.

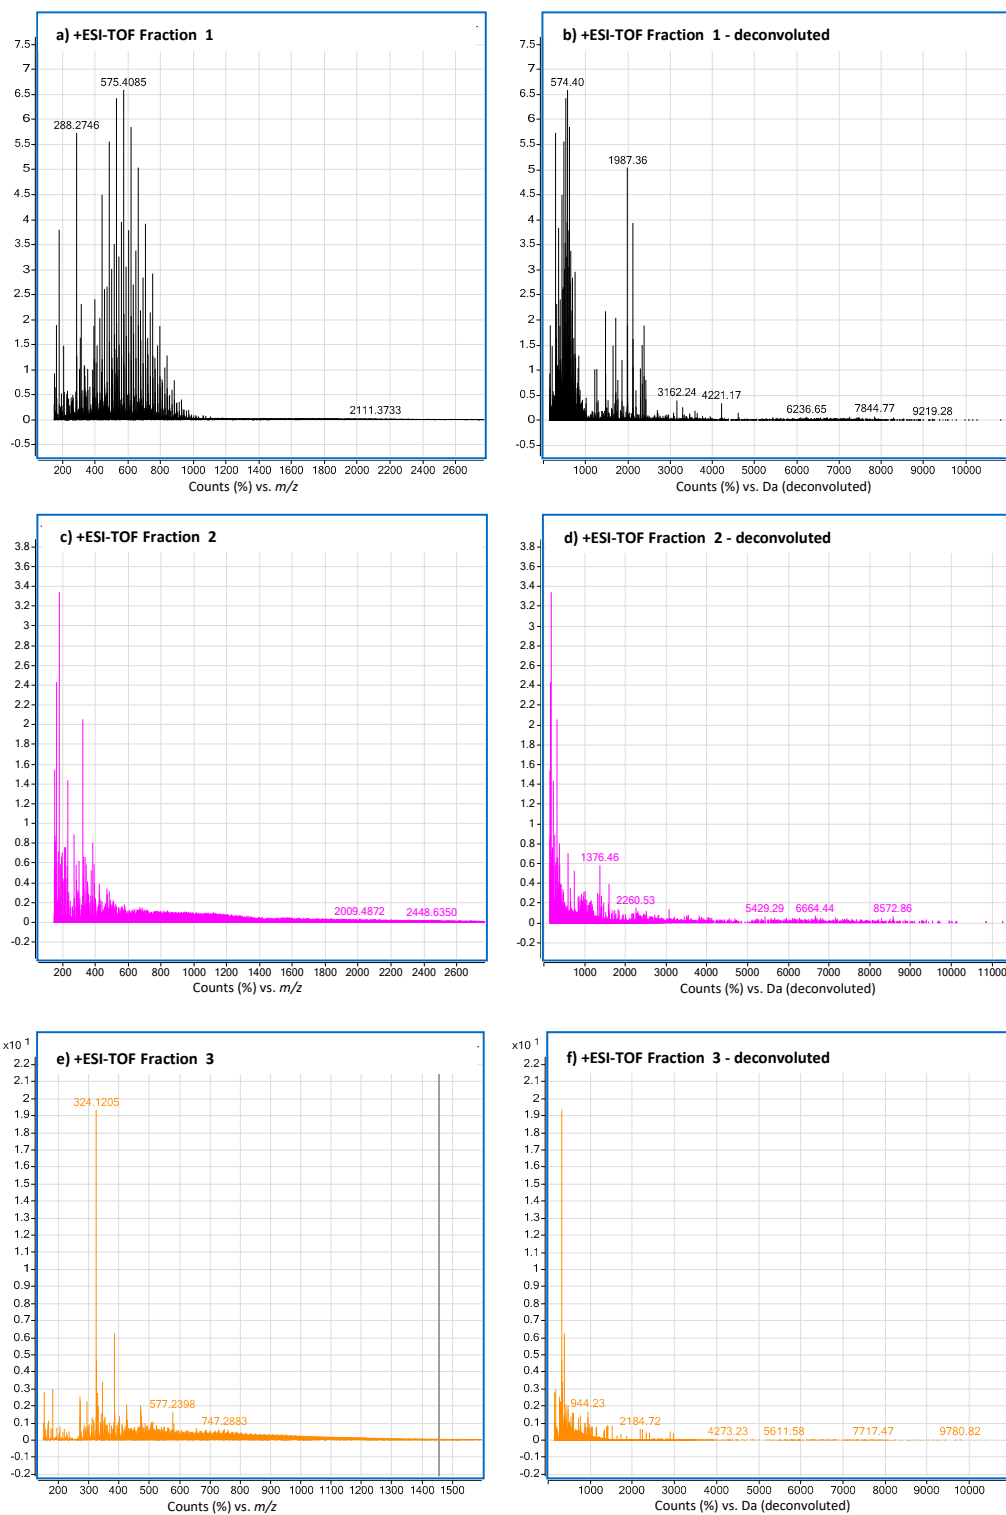

Figure S3 count.

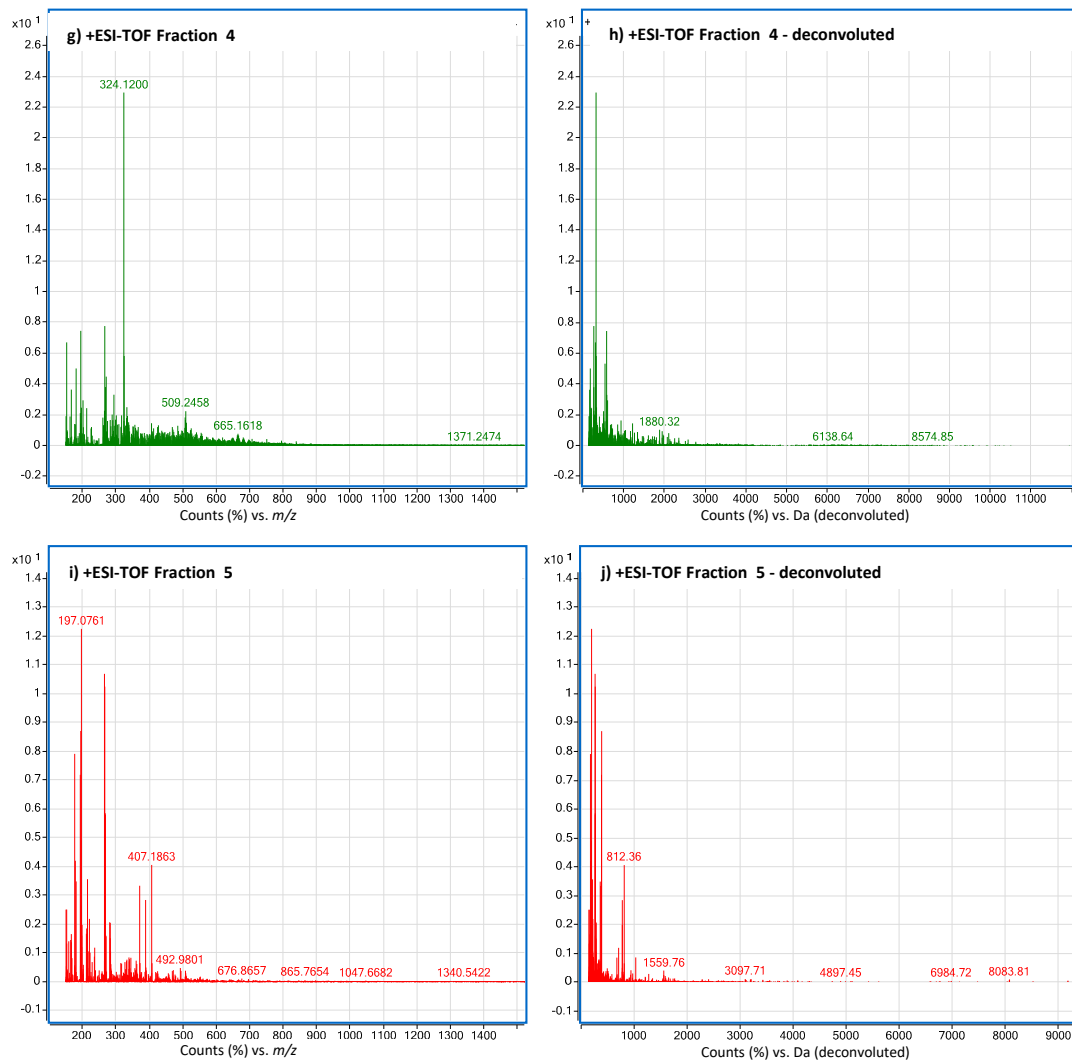



Figure S4. Aggregated TD-Py-GC-MS peak areas based on the GC-MS TIC response

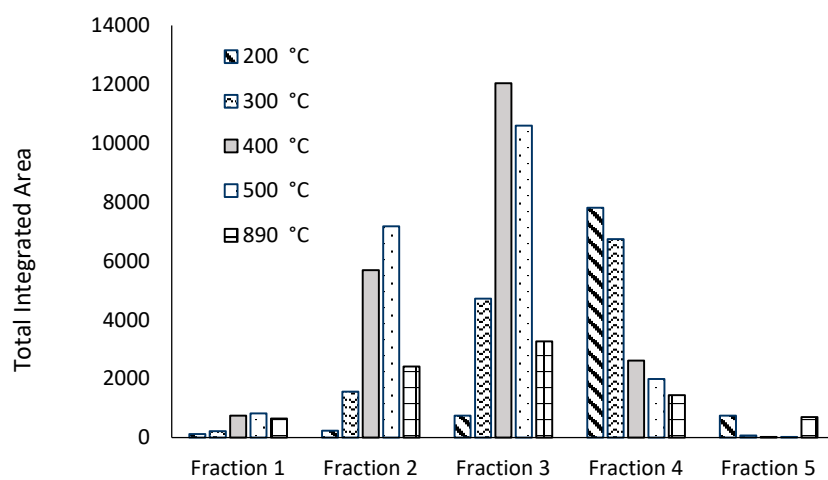

Figure S5. TD-Py-GC-MS profiles for each SEC fraction based on the TIC peak areas response

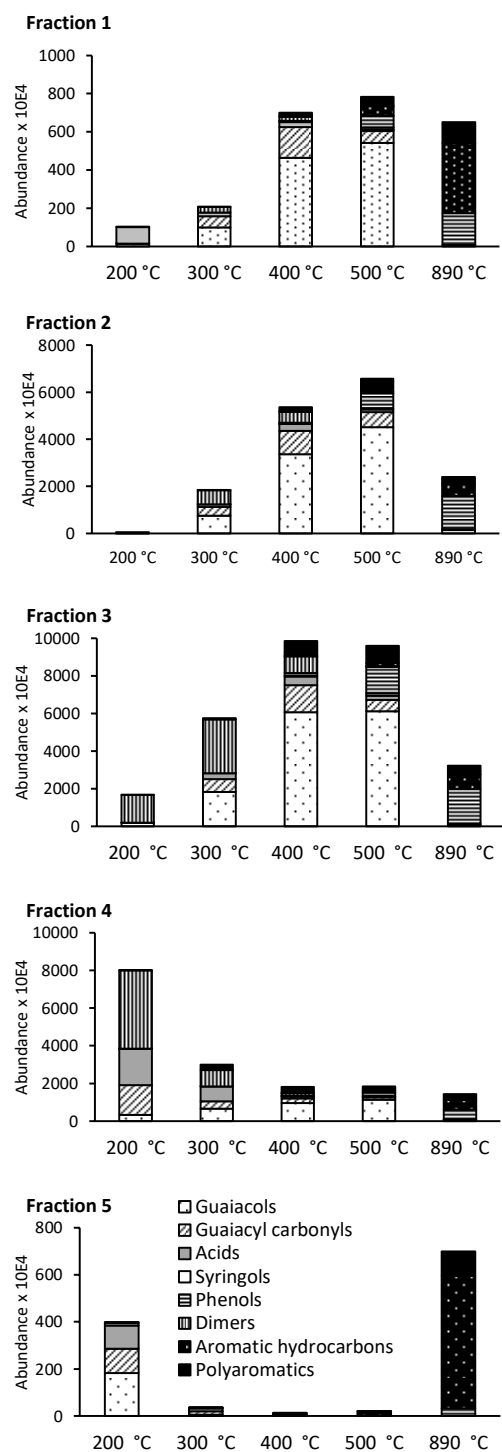

Figure S6.  $^{31}\text{P}$  NMR spectra of SEC weight fractionated lignin samples.

The top spectrum belongs to the lowest molecular weight fraction, 3NA-81-6, while the second spectrum from the bottom is for the highest molecular weight fraction, 3-NA-2. The bottom spectrum is a pre-eluate fraction comprised mostly of impurities of carbohydrate origins.

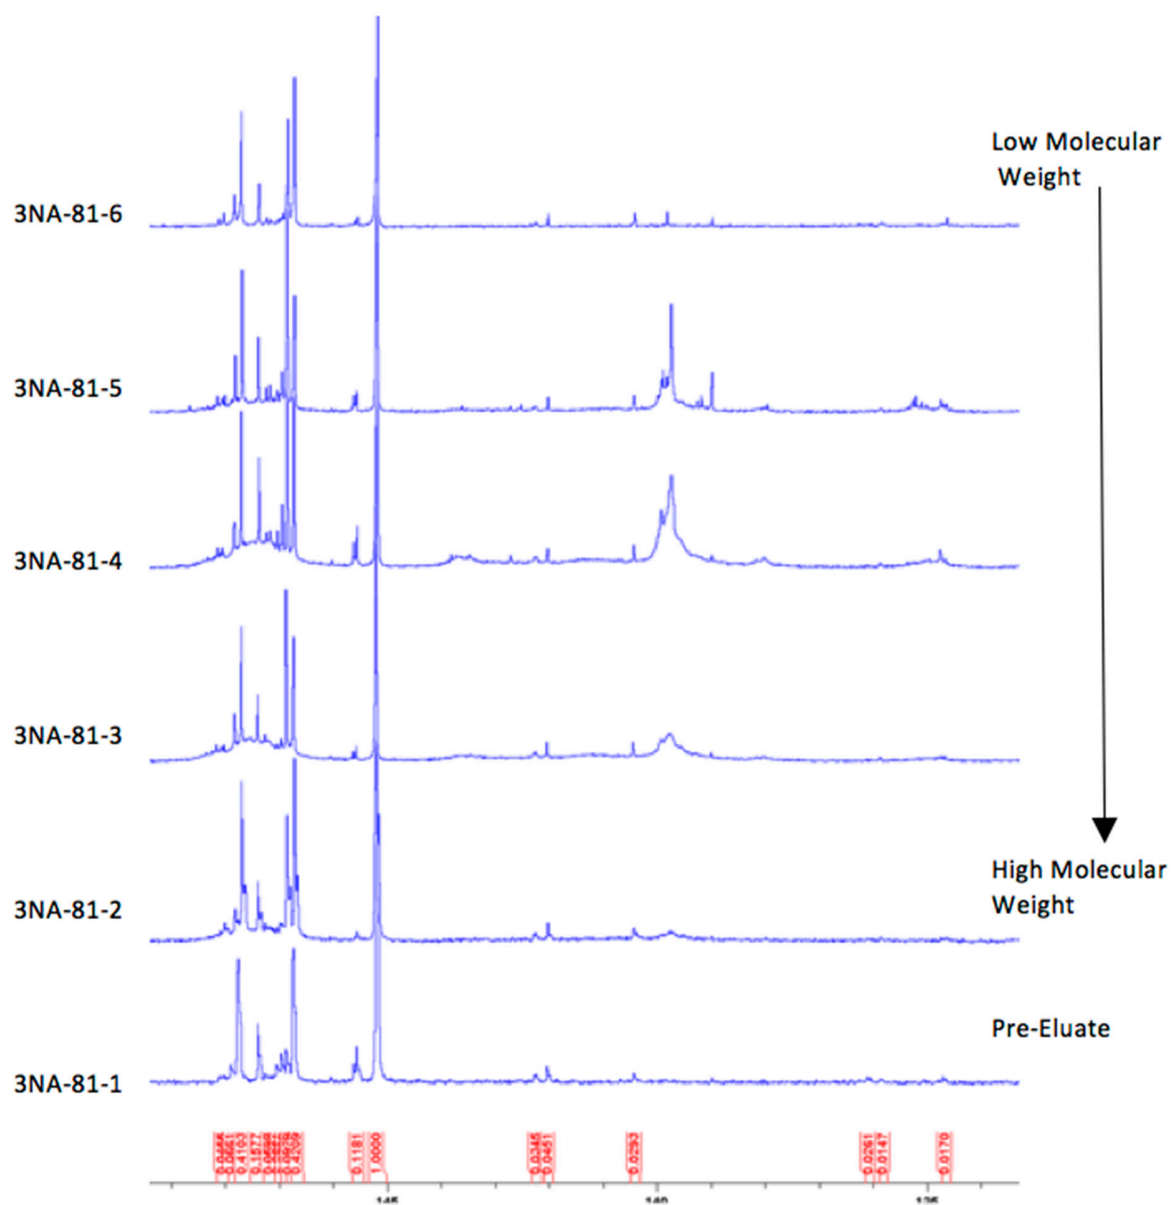

Figure S7. Relative abundance of characteristic functional groups determined by  $^{31}\text{P}$  NMR

a) Relative abundance

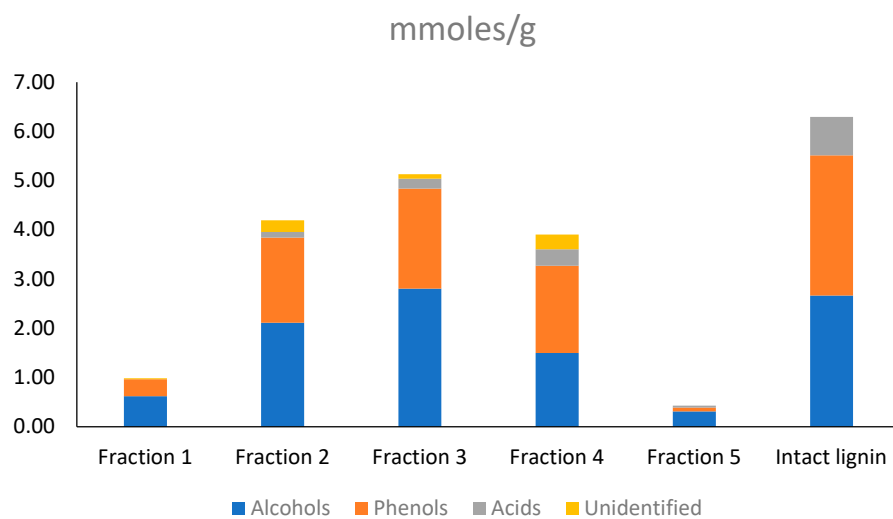

b) Normalized

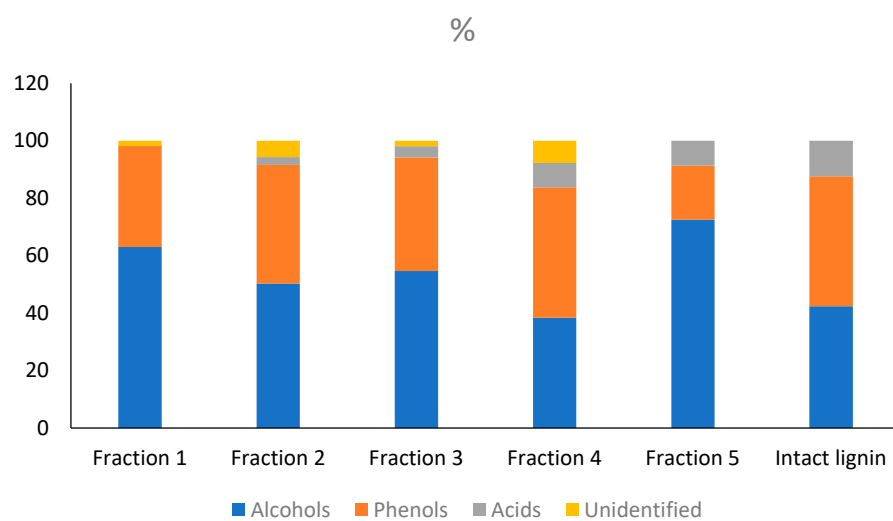

Supplement: s1 [file s1]
